## Correspondence

# Letter to the Editor: Comments on “Association between the ICAM-1 gene polymorphism and coronary heart disease risk: a meta-analysis”

 Morteza Gholami<sup>1,2</sup>, Mahsa M. Amoli<sup>1</sup> and Farshad Sharifi<sup>3</sup>

<sup>1</sup>Metabolic Disorders Research Center, Endocrinology and Metabolism Molecular-Cellular Sciences Institute, Tehran University of Medical Sciences, Tehran, Iran; <sup>2</sup>Endocrinology and Metabolism Research Center, Endocrinology and Metabolism Clinical Sciences Institute, Tehran University of Medical Sciences, Tehran, Iran; <sup>3</sup>Elderly Health Research Center, Endocrinology and Metabolism Population Sciences Institute, Tehran University of Medical Sciences, Tehran, Iran

**Correspondence:** Morteza Gholami (biologygholami@gmail.com, gholamim@razi.tums.ac.ir)

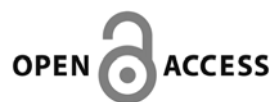

Yin et al. (*Bioscience Reports* (2019) 39, BSR20180923) recently published a meta-analysis about the association between the K469E (rs5498) polymorphism and risk of coronary heart disease (CHD). Authors included 14 studies based on their inclusion criteria. They indicated that only studies which their genotyping data were in Hardy–Weinberg equilibrium (HWE) were included in their meta-analysis. They also tested HWE for these studies and found all the control groups in HWE. As their main finding, they concluded that ‘K469E polymorphism is associated with CHD risk and the K allele is a more significant risk factor for developing CHD amongst Chinese and Caucasians populations’. However, there seems to be presenting some mistakes in HWE test which strongly affects included studies and the final conclusion. Here we aim to comment on the issue.

Dear Editor,

Unfortunately, based on our analysis, contrary to meta-analysis by Yin et al. [1], studies they included in their meta-analysis were not in Hardy–Weinberg equilibrium (HWE), and many included articles (seven articles) show deviation from HWE, even after adjustment. It seems that authors made some mistake in calculating HWE. In Table 1 we showed *P*-values for HWE test and ineligible studies, based on ‘HardyWeinberg’ package in R programming language (<https://cran.rproject.org/web/packages/HardyWeinberg/HardyWeinberg.pdf>). Our results were double checked with STATA (genhwi form of genhw, <https://www.stata.com/users/mcleves/genhw/genhw.hlp>), and also manually. In manual method, *P*-value of HWE test was calculated based on four following steps. (i) We calculated allele frequencies in control group:  $K = [(2 \times KK) + KE] / (2 \times \text{total})$ , so  $E = 1 - K$ . (ii) We calculated expected genotypes based on allele frequencies:  $KK = K^2 \times \text{total}$ ,  $KE = (2 \times K \times E) \times \text{total}$ , and  $EE = E^2 \times \text{total}$ . (iii) We carried out chi-square test between observed and expected genotypes ( $\chi^2 = \sum (Ob - Ex)^2 / Ex$ ). (iv) Finally, results were interpreted based on chi-square routine distribution table (steps (i–iii) are shown in Table 2 and step (iv) in Table 3). Also regarding the study by Sarecka-Hujar et al. [2], the genotyping data were not correctly included in Table 1 of their meta-analysis, GG(EE) and AA(KK) genotypes and allele frequencies were displaced in both case and control groups. Correct data are shown in Table 1. Also, they [2] indicate that ‘the distribution of ICAM1 genotypes was not compatible with HWE’ which clearly violates inclusion criteria (iv) in Yin et al. [1] meta-analysis.

After deleting studies with deviation from HWE and meta-analysis of included articles, we found completely different results. Genotyping data related to seven finally included articles [2–8], involving 1582 coronary heart disease (CHD) cases and 1715 controls, are shown in Table 1 (shown in bold and black color), and meta-analysis results based on five different genetics models are presented in Table 4 and Figure 1. According to our observation, we did not find a significant result in different and overall ethnicity in any genetic model. Finally, in contrast with Yin et al. [1] study and based on meta-analysis of studies

Received: 06 March 2019  
Revised: 29 April 2019  
Accepted: 07 May 2019

Accepted Manuscript Online:  
09 May 2019  
Version of Record published:  
17 May 2019

**Table 1 Genotyping data and HWE results for studies in Yin et al. [1] meta-analysis**

| Studies                       | Case<br>KK | KE         | EE        | Control<br>KK | KE         | EE        | P-value      | Adjusted<br>P-value | Design         |
|-------------------------------|------------|------------|-----------|---------------|------------|-----------|--------------|---------------------|----------------|
| Shang, Q. (2005)              | 48         | 50         | 24        | 29            | 33         | 35        | 0.002        | 0.005               | Exclude        |
| <b>Li, Y.J. (2010)</b>        | <b>47</b>  | <b>39</b>  | <b>7</b>  | <b>52</b>     | <b>36</b>  | <b>13</b> | <b>0.103</b> | <b>0.180</b>        | <b>Include</b> |
| Lu, F.H. (2006)               | 61         | 69         | 30        | 45            | 65         | 59        | 0.003        | 0.008               | Exclude        |
| <b>Zhang, S.R. (2006)</b>     | <b>111</b> | <b>52</b>  | <b>10</b> | <b>69</b>     | <b>59</b>  | <b>13</b> | <b>0.940</b> | <b>0.973</b>        | <b>Include</b> |
| Rao, D. (2005)                | 84         | 41         | 20        | 59            | 19         | 66        | <0.001       | <0.001              | Exclude        |
| <b>Wei, Y.S. (2006)</b>       | <b>124</b> | <b>84</b>  | <b>17</b> | <b>101</b>    | <b>103</b> | <b>26</b> | <b>0.973</b> | <b>0.973</b>        | <b>Include</b> |
| Zhou, Y.L. (2006)             | 38         | 45         | 20        | 102           | 62         | 33        | <0.001       | <0.001              | Exclude        |
| <b>Wang, M. (2005)</b>        | <b>96</b>  | <b>61</b>  | <b>8</b>  | <b>91</b>     | <b>90</b>  | <b>18</b> | <b>0.524</b> | <b>0.734</b>        | <b>Include</b> |
| Jiang, H. (2002)              | 202        | 226        | 100       | 60            | 66         | 87        | <0.001       | <0.001              | Exclude        |
| <b>Milutinović, A. (2006)</b> | <b>47</b>  | <b>72</b>  | <b>33</b> | <b>65</b>     | <b>109</b> | <b>41</b> | <b>0.695</b> | <b>0.811</b>        | <b>Include</b> |
| Sarecka-Hujar, B. (2009)      | 61         | 118        | 12        | 73            | 122        | 8         | <0.001       | <0.001              | Exclude        |
| <b>Mohamed, A. (2010)</b>     | <b>20</b>  | <b>37</b>  | <b>43</b> | <b>2</b>      | <b>11</b>  | <b>37</b> | <b>0.332</b> | <b>0.516</b>        | <b>Include</b> |
| <b>Luo, J.Y. (2014)</b>       | <b>339</b> | <b>278</b> | <b>57</b> | <b>461</b>    | <b>273</b> | <b>45</b> | <b>0.587</b> | <b>0.747</b>        | <b>Include</b> |
| Yang, M. (2014)               | 305        | 251        | 48        | 266           | 160        | 42        | 0.015        | 0.029               | Exclude        |

Finally included articles are shown in bold.

**Table 2 Results of steps (i–iii) of manual HWE test**

| Studies                  | Ob = Observed genotypes |     |    |       | Allele frequency |      | Ex = Expected genotypes |       |      | X <sup>2</sup> | P-value          |
|--------------------------|-------------------------|-----|----|-------|------------------|------|-------------------------|-------|------|----------------|------------------|
|                          | KK                      | KE  | EE | Total | K                | E    | KK                      | KE    | EE   |                |                  |
| Shang, Q. (2005)         | 29                      | 33  | 35 | 97    | 0.47             | 0.53 | 21.3                    | 48.3  | 27.3 | 9.75           | <b>0.002</b>     |
| Li, Y.J. (2010)          | 52                      | 36  | 13 | 101   | 0.69             | 0.31 | 48.5                    | 43.0  | 9.5  | 2.66           | <b>0.103</b>     |
| Lu, F.H. (2006)          | 45                      | 65  | 59 | 169   | 0.46             | 0.54 | 35.5                    | 83.9  | 49.5 | 8.59           | <b>0.003</b>     |
| Zhang, S.R. (2006)       | 69                      | 59  | 13 | 141   | 0.70             | 0.30 | 68.8                    | 59.4  | 12.8 | 0.01           | <b>0.940</b>     |
| Rao, D. (2005)           | 59                      | 19  | 66 | 144   | 0.48             | 0.52 | 32.6                    | 71.8  | 39.6 | 77.90          | <b>&lt;0.001</b> |
| Wei, Y.S. (2006)         | 101                     | 103 | 26 | 230   | 0.66             | 0.34 | 101.1                   | 102.8 | 26.1 | 0.00           | <b>0.973</b>     |
| Zhou, Y.L. (2006)        | 102                     | 62  | 33 | 197   | 0.68             | 0.32 | 89.8                    | 86.4  | 20.8 | 15.73          | <b>&lt;0.001</b> |
| Wang, M. (2005)          | 91                      | 90  | 18 | 199   | 0.68             | 0.32 | 92.9                    | 86.1  | 19.9 | 0.41           | <b>0.524</b>     |
| Jiang, H. (2002)         | 60                      | 66  | 87 | 213   | 0.44             | 0.56 | 40.6                    | 104.8 | 67.6 | 29.19          | <b>&lt;0.001</b> |
| Milutinović, A. (2006)   | 65                      | 109 | 41 | 215   | 0.56             | 0.44 | 66.4                    | 106.2 | 42.4 | 0.15           | <b>0.695</b>     |
| Sarecka-Hujar, B. (2009) | 73                      | 122 | 8  | 203   | 0.66             | 0.34 | 88.5                    | 91.1  | 23.5 | 23.37          | <b>&lt;0.001</b> |
| Mohamed, A. (2010)       | 2                       | 11  | 37 | 50    | 0.15             | 0.85 | 1.1                     | 12.8  | 36.1 | 0.94           | <b>0.332</b>     |
| Luo, J.Y. (2014)         | 461                     | 273 | 45 | 779   | 0.77             | 0.23 | 458.3                   | 278.4 | 42.3 | 0.30           | <b>0.587</b>     |
| Yang, M. (2014)          | 266                     | 160 | 42 | 468   | 0.74             | 0.26 | 255.8                   | 180.4 | 31.8 | 5.98           | <b>0.015</b>     |

**Table 3 Chi-square distribution table**

| P-value | χ <sup>2</sup> (df = 1) |
|---------|-------------------------|
| 0.995   | 0.000                   |
| 0.975   | 0.000                   |
| 0.20    | 1.642                   |
| 0.10    | 2.706                   |
| 0.05    | 3.841                   |
| 0.025   | 5.024                   |
| 0.02    | 5.412                   |
| 0.01    | 6.635                   |
| 0.005   | 7.879                   |
| 0.002   | 9.550                   |
| 0.001   | 10.828                  |

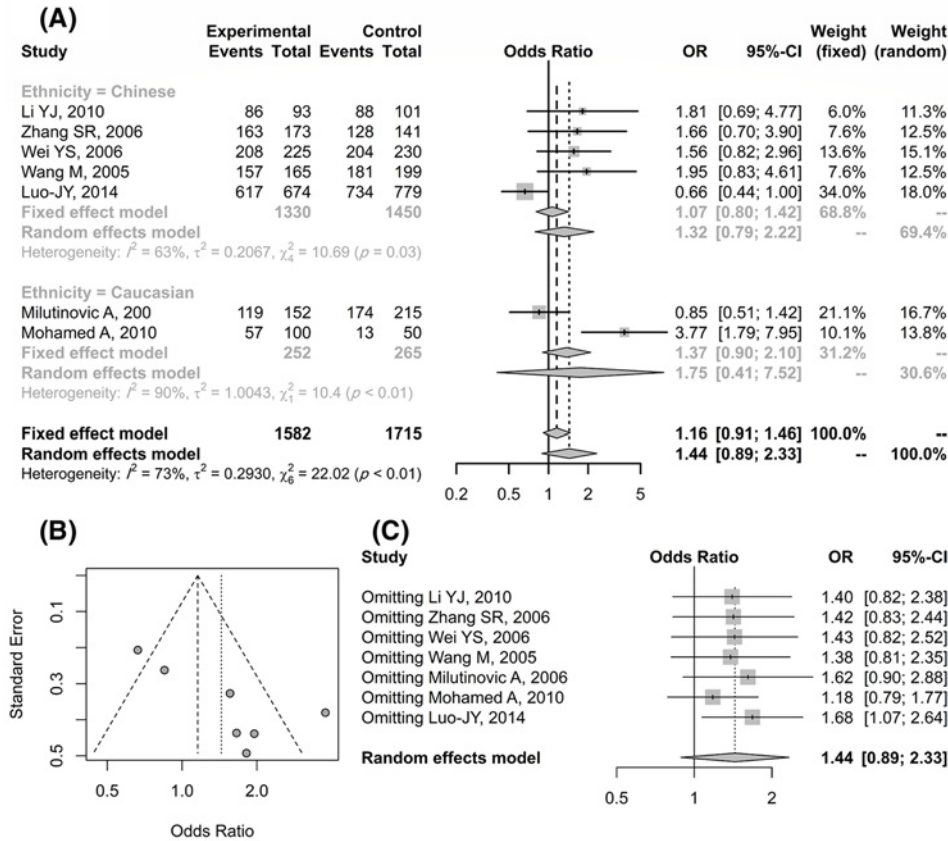

**Figure 1. CHD risk associated with the K469E polymorphism for K/E + K/K versus E/E genotype**

Forest plot of CHD risk associated with the K469E polymorphism for K/E + K/K versus E/E genotype (A). Funnel plot (B) and forest plot (C) related to publication bias and sensitivity analysis.

**Table 4 Meta-analysis of CHD risk associated with the K469E polymorphism based on different genetics models**

| Classification | Allelic (K vs. E) OR [95% CI] | Q test P-value   | K/E + K/K vs. E/E OR [95% CI] | Q test P-value   | KK vs. K/E + E/E OR [95% CI] | Q test P-value   | K/E vs. K/K + E/E OR [95% CI] | Q test P-value   |
|----------------|-------------------------------|------------------|-------------------------------|------------------|------------------------------|------------------|-------------------------------|------------------|
|                | Chinese                       | 1.23 [0.84–1.78] | 0.01                          | 1.32 [0.79–2.22] | 0.03                         | 1.25 [0.79–1.98] | 0.01                          | 0.89 [0.63–1.26] |
| Caucasian      | 1.79 [0.50–6.44]              | 0.01             | 1.75 [0.41–7.52]              | 0.01             | 2.14 [0.39–11.7]             | 0.03             | 1.26 [0.55–2.93]              | 0.06             |
| Overall        | 1.33 [0.95–1.85]              | 0.01             | 1.44 [0.89–2.33]              | 0.01             | 1.32 [0.89–1.96]             | 0.01             | 0.95 [0.71–1.27]              | 0.01             |

  

| Classification | K/K vs. E/E OR [95% CI] | Q test P-value   | K/K vs. K/E OR [95% CI] | Q test P-value   | K/E vs. E/E OR [95% CI] | Q test P-value   |
|----------------|-------------------------|------------------|-------------------------|------------------|-------------------------|------------------|
|                | Chinese                 | 1.47 [0.75–2.88] | 0.01                    | 1.20 [0.78–1.83] | 0.01                    | 1.06 [0.78–1.43] |
| Caucasian      | 2.48 [0.27–22.49]       | 0.01             | 1.19 [0.75–1.88]        | 0.24             | 1.49 [0.43–5.10]        | 0.01             |
| Overall        | 1.57 [0.88–2.80]        | 0.01             | 1.22 [0.86–1.74]        | 0.03             | 1.11 [0.86–1.42]        | 0.01             |

in HWE, it can be concluded that ICAM-1 gene polymorphism E469K may not be related to the risk of CHD. More studies could help us to get a definitive result.

**Competing Interests**

The authors declare that there are no competing interests associated with the manuscript.

## Abbreviations

CHD, Coronary heart disease; HWE, Hardy–Weinberg equilibrium.

## References

- 1 Yin, D.L., Zhao, X.H., Zhou, Y., Wang, Y., Duan, P., Li, Q.X. et al. (2019) Association between the ICAM-1 gene polymorphism and coronary heart disease risk: a meta-analysis. *Biosci. Rep.* **39**, BSR20180923, <https://doi.org/10.1042/BSR20180923>
- 2 Sarecka-Hujar, B., Zak, I. and Krauze, J. (2009) Interactions between rs5498 polymorphism in the ICAM1 gene and traditional risk factors influence susceptibility to coronary artery disease. *Clin. Exp. Med.* **9**, 117–124, <https://doi.org/10.1007/s10238-008-0022-0>
- 3 Luo, J.Y., Ma, Y.T., Xie, X., Yang, Y.N., Li, X.M., Ma, X. et al. (2014) Association of intercellular adhesion molecule-1 gene polymorphism with coronary heart disease. *Mol. Med. Rep.* **10**, 1343–1348, <https://doi.org/10.3892/mmr.2014.2360>
- 4 Li, Y.J., Han, M., Zheng, B. et al. (2010) The relationship between K469E polymorphism of the intercellular adhesion molecule-1 gene and coronary heart disease [in chinese]. *Chin. J. Gerontol.* **23**, 3494–3495
- 5 Zhang, S.R., Xu, L.X., Gao, Q.Q., Zhang, H.Q., Xu, B.S., Lin, J. et al. (2006) The correlation between ICAM-1 gene K469E polymorphism and coronary heart disease. *Chin. J. Med. Gene* **23**, 205–207
- 6 Wei, Y.S., Tang, R.G., Yuan, X.H. et al. (2006) Association between polymorphism of intercellular adhesion molecule-1 gene K469E and coronary heart disease. *Chin. J. Immunol.* **22**, 1056–1059
- 7 Wang, M., Li, Y., Zhang, P.A., Yang, C., Xiang, P.X., Wei, Y.S. et al. (2005) Study on the intercellular molecule-1 polymorphisms in an Chinese population with myocardial infarction. *Chin. J. Epidemiol.* **26**, 702–706
- 8 Milutinovic, A. and Petrovic, D. (2006) The K469E polymorphism of the intracellular adhesion molecule 1 (ICAM-1) gene is not associated with myocardial infarction in Caucasians with type 2 diabetes. *Folia Biol. (Praha)* **52**, 79–80
